# Supplementary material for: Relative Contribution of Framework and CDR Regions in Antibody Variable Domains to Multimerisation of Fv- and scFv-Containing Bispecific Antibodies
Source: PubMed Central journal article supplement (PMC6640685; doi:10.3390/antib7030035), 2018-08-31

# Supplementary: Relative Contribution of Framework and CDR Regions in Antibody Variable Domains to Multimerisation of Fv- and scFv-Containing Bispecific Antibodies

Pallavi Bhatta \* and David P. Humphreys

Protein Sciences Group, UCB Pharma, Slough, Berkshire SL1 3WE, UK; David.Humphreys@ucb.com

\* Correspondence: Pallavi.Bhatta@ucb.com

Received: 12 July 2018; Accepted: 30 August 2018; Published: 31 August 2018

## Supplementary Data

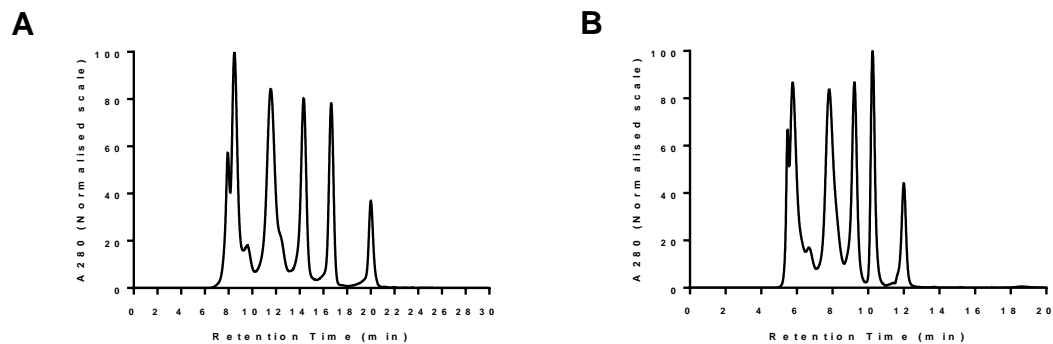

**Figure S1. Gel filtration calibration.** (A) S200 SEC profile. (B) G3000 SEC profile. Gel filtration standard (BioRad) was loaded for molecular weight estimation of test samples. The mixture contained bovine thyroglobulin (670,000 Da), bovine  $\gamma$ -globulin (158,000 Da), chicken ovalbumin (44,000 Da), equine myoglobin (17,000 Da) and vitamin B12 (1350 Da).

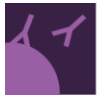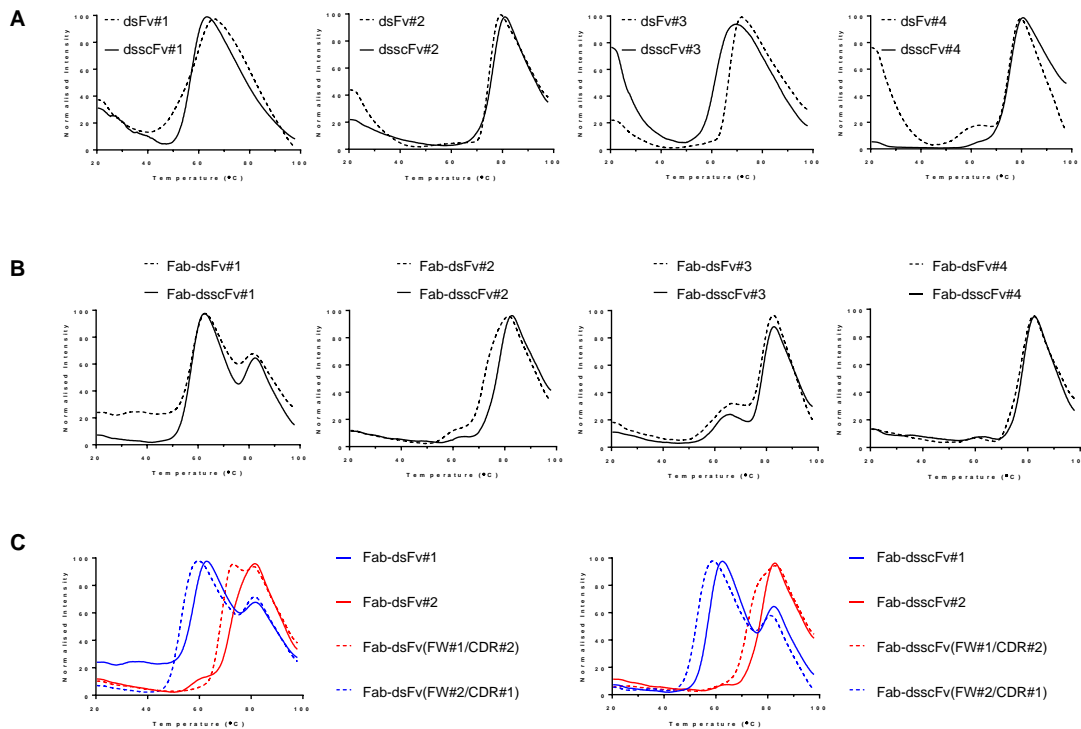

**Figure S2. Thermograms of purified proteins. (A)** dsFv vs dsscFv. **(B)** Fab-dsFv vs Fab-dsscFv. **(C)** Wild type vs FW/CDR 'swapped' Fab-dsFv and Fab-dsscFv. Fluorescence changes in protein/SYPRO®Orange dye mixtures were analysed on a 7900HT fast real-time PCR System, set at 20 °C to 99 °C with a ramp rate of 1.1 °C/min. The thermograms show unfolding transitions of proteins in PBS pH7.4. The inflection point of the slope(s) was used to generate the  $T_m$ .

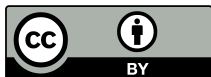

Supplement: antibodies-07-00035-s001.pdf [file antibodies-07-00035-s001.pdf]
